# Supplementary material for: Graphene-wrapped single-crystalline Fe3O4nanorods with superior lithium-storage capabilities
Source: Royal Society of Chemistry journal article supplement (doi:10.1039/c4nj00767k), 2014-06-25
Supplement: c4nj00767k1.pdf [file c4nj00767k1.pdf]

## Graphene-Wrapped Single-Crystalline Fe<sub>3</sub>O<sub>4</sub> Nanorods with Superior Lithium-Storage Capabilities

Jinwei Yin,<sup>1</sup> Huimin Shi,<sup>1</sup> Ping Wu,\* Qingyun Zhu, Hui Wang, Yawen Tang, Yiming Zhou\* and Tianhong Lu

Jiangsu Key Laboratory of New Power Batteries, Jiangsu Collaborative Innovation Center of Biomedical Functional Materials, School of Chemistry and Materials Science, Nanjing Normal University, Nanjing 210023, PR China.

\* Corresponding authors. Tel.: +86 25 85891651; fax: +86 25 83243286.

E-mail: [zjuwuping@njnu.edu.cn](mailto:zjuwuping@njnu.edu.cn); [zhouyiming@njnu.edu.cn](mailto:zhouyiming@njnu.edu.cn)

<sup>1</sup> Equal contribution to this work.

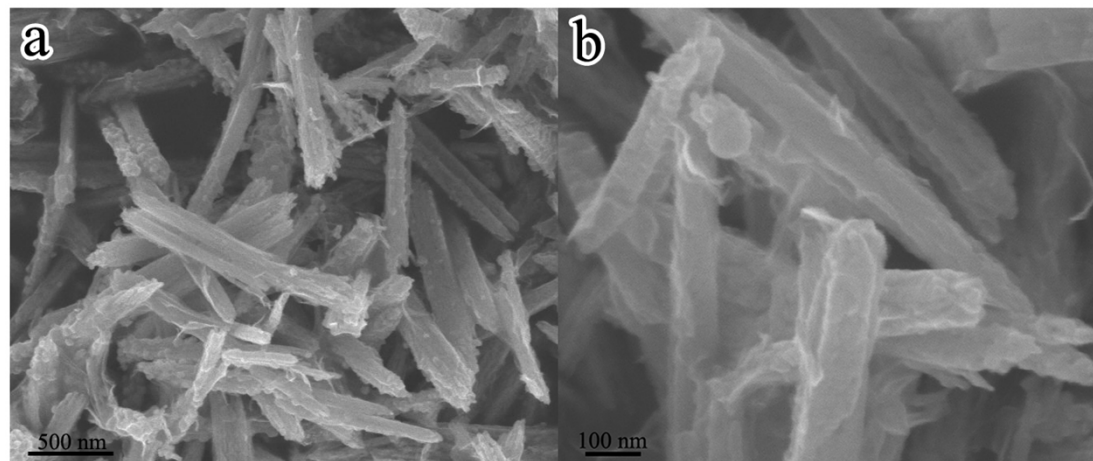

**Figure S1** SEM images of the Fe<sub>3</sub>O<sub>4</sub>@G nanorods.

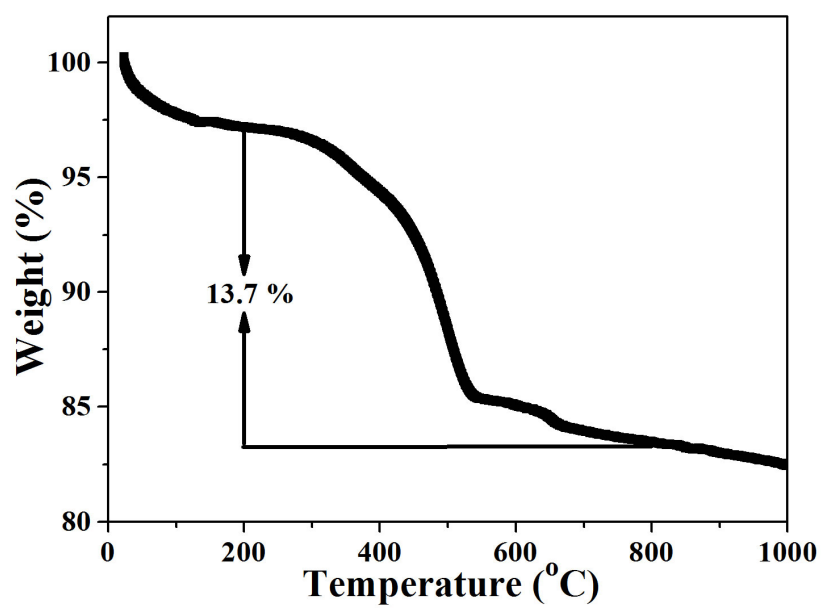

**Figure S2** TGA curves of the Fe<sub>3</sub>O<sub>4</sub>@G nanorods.
